# Supplementary material for: Caregivers of School-aged Children with Autism: Social Media as a Source of Support
Source: Springer Nature journal article supplement (doi:10.1007/s10826-017-0855-9), 2017-08-31
Supplement: MOESM1 [file 14963120]

Appendix

Interview Schedule

**Biographical Information Details of Child**

Name of Participant: Name:

D.O.B.: D.O.B.:

Age: Age:

Physical Address: Grade:

Postal Address:

Contact Number:

**Background to the group**

1. How long have you been a member of the WhatsApp group?
2. How often do you go onto the group?
3. How many parents contribute to the group discussions?
4. Have you formed any friendships with parents on the group?
5. Does the group ever meet face to face?
6. Do you prefer face to face meeting in comparison to a support group on WhatsApp, and why?
7. What topics are discussed on the group and how often?

**Communication**

1. Describe the communication characteristics with which your child presents? (e.g. does he/she use gestures to tell you when they want something).
2. Is your child receiving intervention from a speech-language therapist or any other health care professional (e.g. OT/physio)? If yes, who?
3. Tell me about how the use of this support group provided you with support and help with regard to communication difficulties you experienced with your child.

**Feeding**

1. Describe the feeding characteristics that your child presents with.
2. Describe how the use of this support group provided you with support and help with regards to feeding difficulties you experienced with your child. (e.g: does your child prefer hard or soft foods or have specific texture and taste preferences).

**Other**

1. In addition to communication and feeding, what other characteristics of ASD does your child present with?
2. Describe how the use of this support group provided you with support and help with in other areas where you had difficulty (probe: other behaviour/ characteristics your child presented with).
3. Tell me about your experience of social interaction on this WhatsApp support group.
4. Does the group ever speak about dealing with parent emotions? Explain.

**With regards to the presence of the speech-language pathologist on the group**

- 1. Do you find her presence on the group helpful? If yes, please explain why.
  2. Do you feel the dynamics of the group would be different if she was not on the group?

1. Does she initiate most of the discussions?
2. How often does she participate in group discussions?

**Advantages**

1. Tell me about how you found these group discussions to be beneficial in providing you with support?
2. Describe your overall experience on the group.
3. In your opinion, describe the advantages of having a support group on WhatsApp for parents who have children with ASD (e.g., these may be financial reasons).
4. Discuss the usability of using a support group of this nature. Is it easy to use, or do you find it difficulty, and why?

**Limitations**

1. Tell us about the limitations which you experienced on this group.
2. Describe how using the WhatsApp support group affected family dynamics in terms of family time and cultural considerations.

**Suggestions and Recommendations**

1. What suggestions and recommendations can you share in terms of improving the efficiency of the group?
